# Supplementary material
Source: PubMed Central journal article supplement (PMC4482778)
Supplement: NIHMS688924-supplement-2.pdf [file NIHMS688924-supplement-2.pdf]

### Supplementary Table 1

#### Overview of Phenotypes Produced by Different Genetic Manipulations of *Nrxn3α/β* in Hippocampal and Olfactory Bulb Neurons

| Parameter                        | <i>Nrxn3α/β</i> KO | <i>Nrxn3α</i> KO | <i>Nrxn3α/β</i> SS#4 KI |   |
|----------------------------------|--------------------|------------------|-------------------------|---|
| <b>1. Hippocampal Neurons</b>    |                    |                  |                         |   |
| mEPSC Frequency                  | ↔                  | ↔                | ↔                       |   |
| mEPSC Amplitude                  | ↓↓                 | ↔                | ↓↓                      |   |
| mIPSC Frequency                  | ↔                  | n.d.             | ↔                       |   |
| mIPSC Amplitude                  | ↔                  | n.d.             | ↔                       |   |
| AMPA-EPSCs                       | ↓↓                 | ↔                | ↓↓                      |   |
| NMDAR-EPSCs                      | ↔                  | ↔                | ↔                       |   |
| PPR of NMDAR-EPSCs               | ↔                  | ↔                | ↔                       |   |
| IPSCs                            | ↔                  |                  | n.d.                    | ↔ |
| <b>2. Olfactory Bulb Neurons</b> |                    |                  |                         |   |
| mEPSC Frequency                  | ↔                  | n.d.             | ↔                       |   |
| mEPSC Amplitude                  | ↔                  | n.d.             | ↔                       |   |
| mIPSC Frequency                  | ↓↓                 | ↓↓               | ↔                       |   |
| mIPSC Amplitude                  | ↔                  | ↔                | ↔                       |   |
| AMPA-EPSCs                       | ↔                  | n.d.             | ↔                       |   |
| NMDAR-EPSCs                      | ↔                  | n.d.             | ↔                       |   |
| IPSCs                            |                    | ↓↓               | ↓↓                      | ↔ |
| PPR of IPSCs                     |                    | ↑↑               | ↑↑                      | ↔ |

Summary of synaptic findings cross-compared between three genotypes: *Nrxn3α/β* cKO, *Nrxn3α* KO and *Nrxn3<sup>SS#4+</sup>* KI. Arrows indicate changes in synaptic properties measured in the three genotypes from two brain regions.
